# Supplementary material for: Surrounding greenness is associated with lower risk and burden of low birth weight in Iran
Source: PubMed Central journal article supplement (PMC10663448; doi:10.1038/s41467-023-43425-6), 2023-11-21
Supplement: 41467_2023_43425_MOESM1_ESM.pdf [file 41467_2023_43425_MOESM1_ESM.pdf]

## Supplementary Information

### Surrounding greenness is associated with lower risk and burden of low birth weight in Iran

Siqi Luo <sup>1,4</sup>, Yaqi Wang <sup>1,4</sup>, Fatemeh Mayvaneh <sup>2,\*</sup>, Helder Relvas <sup>3</sup>, Mohammad Baaghideh <sup>2</sup>, Kai Wang <sup>1</sup>, Yang Yuan <sup>1</sup>, Zhouxin Yin <sup>1</sup>, Yunquan Zhang <sup>1,\*</sup>

- <sup>1</sup> Institute of Social Development and Health Management, Hubei Province Key Laboratory of Occupational Hazard Identification and Control, School of Public Health, Wuhan University of Science and Technology, Wuhan 430065, China
- <sup>2</sup> Faculty of Geography and Environmental Sciences, Hakim Sabzevari University, Sabzevar 9617916487, Khorasan Razavi, Iran
- <sup>3</sup> CESAM & Department of Environment and Planning, University of Aveiro, 3810-193 Aveiro, Portugal
- <sup>4</sup> These authors contributed equally: Siqi Luo, Yaqi Wang.

\* Corresponding authors:

Dr. Yunquan Zhang, School of Public Health, Wuhan University of Science and Technology, Wuhan 430065, China. Email: [YunquanZhang@wust.edu.cn](mailto:YunquanZhang@wust.edu.cn).

Dr. Fatemeh Mayvaneh, Faculty of Geography and Environmental Sciences, Hakim Sabzevari University, Sabzevar 9617916487, Khorasan Razavi, Iran. Email: [fmayvaneh@yahoo.com](mailto:fmayvaneh@yahoo.com).

## Table of contents

**Table S1 Sensitivity analyses for the associations between LBW/TLBW and greenness exposures within multiple buffers throughout the pregnancy.**

**Table S2 Associations between LBW/TLBW and quartiles of normalized difference vegetation index exposure within multiple buffers.**

**Table S3 Associations between LBW/TLBW and quartiles of enhanced vegetation index exposure within multiple buffers.**

**Table S4 Stratified analyses for the associations of LBW and TLBW with greenness exposure within a 3000-m buffer.**

**Table S5 Estimates of greenness-related attributable fractions and avoidable numbers of LBW and TLBW by achieving targets of mean NDVI or EVI.**

**Figure S1 Exposure-response associations between LBW/TLBW and NDVI (a) or EVI (b) within multiple buffers.**

**Figure S2 Subgroup-specific OR estimates of LBW and TLBW associated with a 0.1-unit increase in NDVI and EVI within a 500-m buffer.**

**Figure S3 Subgroup-specific OR estimates of LBW and TLBW associated with a 0.1-unit increase in NDVI and EVI within a 1000-m buffer.**

**Figure S4 Subgroup-specific OR estimates of LBW and TLBW associated with a 0.1-unit increase in NDVI and EVI within a 2000-m buffer.**

**Figure S5 Geographic locations of 749 hospitals across Iran included in this study.**

**Table S1 Sensitivity analyses for the associations between LBW/TLBW and greenness exposures within multiple buffers throughout the pregnancy.**

| Analytic strategies                                                                   | Buffer | LBW (OR, 95% CI)    |                     | TLBW (OR, 95% CI)   |                     |
|---------------------------------------------------------------------------------------|--------|---------------------|---------------------|---------------------|---------------------|
|                                                                                       |        | NDVI                | EVI                 | NDVI                | EVI                 |
| <b>Including neonates with birth weights between 500 g and 5000 g (n = 4,015,616)</b> |        |                     |                     |                     |                     |
|                                                                                       | 500 m  | 0.926 (0.923–0.929) | 0.908 (0.905–0.912) | 0.915 (0.912–0.919) | 0.895 (0.890–0.899) |
|                                                                                       | 1000 m | 0.920 (0.917–0.922) | 0.898 (0.895–0.902) | 0.908 (0.904–0.911) | 0.884 (0.879–0.888) |
|                                                                                       | 2000 m | 0.912 (0.909–0.915) | 0.887 (0.883–0.891) | 0.899 (0.896–0.903) | 0.872 (0.867–0.876) |
|                                                                                       | 3000 m | 0.907 (0.904–0.910) | 0.879 (0.875–0.883) | 0.893 (0.889–0.897) | 0.862 (0.857–0.867) |
| <b>Incorporating singleton live births (n = 3,976,387)</b>                            |        |                     |                     |                     |                     |
|                                                                                       | 500 m  | 0.929 (0.926–0.932) | 0.912 (0.909–0.916) | 0.919 (0.916–0.922) | 0.900 (0.896–0.904) |
|                                                                                       | 1000 m | 0.922 (0.920–0.925) | 0.903 (0.899–0.906) | 0.911 (0.908–0.914) | 0.889 (0.884–0.893) |
|                                                                                       | 2000 m | 0.916 (0.913–0.919) | 0.892 (0.888–0.896) | 0.903 (0.900–0.907) | 0.878 (0.873–0.882) |
|                                                                                       | 3000 m | 0.910 (0.907–0.913) | 0.884 (0.880–0.888) | 0.897 (0.893–0.900) | 0.868 (0.863–0.873) |
| <b>Restricting maternal age at 13–50 years old (n = 3,949,357)</b>                    |        |                     |                     |                     |                     |
|                                                                                       | 500 m  | 0.929 (0.927–0.932) | 0.913 (0.909–0.916) | 0.920 (0.917–0.924) | 0.902 (0.897–0.906) |
|                                                                                       | 1000 m | 0.923 (0.920–0.926) | 0.903 (0.900–0.907) | 0.913 (0.909–0.916) | 0.891 (0.886–0.895) |
|                                                                                       | 2000 m | 0.916 (0.913–0.919) | 0.893 (0.889–0.897) | 0.905 (0.902–0.909) | 0.880 (0.875–0.884) |
|                                                                                       | 3000 m | 0.911 (0.908–0.914) | 0.885 (0.881–0.889) | 0.899 (0.895–0.902) | 0.870 (0.865–0.875) |

(Table S1 continued)

| Analytic strategies                                                                        | Buffer | LBW (OR, 95% CI)    |                     | TLBW (OR, 95% CI)   |                     |
|--------------------------------------------------------------------------------------------|--------|---------------------|---------------------|---------------------|---------------------|
|                                                                                            |        | NDVI                | EVI                 | NDVI                | EVI                 |
| <b>Including neonates whose mothers have no diabetes and hypotension (n = 3,862,524)</b>   |        |                     |                     |                     |                     |
|                                                                                            | 500 m  | 0.928 (0.925–0.931) | 0.911 (0.908–0.915) | 0.919 (0.916–0.923) | 0.901 (0.896–0.905) |
|                                                                                            | 1000 m | 0.922 (0.919–0.925) | 0.902 (0.898–0.906) | 0.912 (0.908–0.915) | 0.890 (0.885–0.894) |
|                                                                                            | 2000 m | 0.915 (0.912–0.918) | 0.891 (0.888–0.895) | 0.904 (0.901–0.908) | 0.879 (0.874–0.883) |
|                                                                                            | 3000 m | 0.909 (0.906–0.912) | 0.883 (0.879–0.887) | 0.897 (0.894–0.901) | 0.869 (0.864–0.873) |
| <b>Incorporating neonates whose mothers have no delivery complications (n = 3,914,965)</b> |        |                     |                     |                     |                     |
|                                                                                            | 500 m  | 0.929 (0.926–0.932) | 0.913 (0.909–0.916) | 0.920 (0.917–0.924) | 0.902 (0.898–0.906) |
|                                                                                            | 1000 m | 0.923 (0.920–0.925) | 0.903 (0.899–0.907) | 0.913 (0.909–0.916) | 0.891 (0.887–0.896) |
|                                                                                            | 2000 m | 0.916 (0.913–0.919) | 0.893 (0.889–0.896) | 0.905 (0.902–0.909) | 0.880 (0.876–0.885) |
|                                                                                            | 3000 m | 0.910 (0.907–0.913) | 0.884 (0.880–0.888) | 0.899 (0.895–0.902) | 0.870 (0.866–0.875) |
| <b>Additionally adjusting for provincial-level SES variables (n = 4,021,741)</b>           |        |                     |                     |                     |                     |
|                                                                                            | 500 m  | 0.938 (0.935–0.941) | 0.926 (0.922–0.930) | 0.928 (0.925–0.932) | 0.914 (0.910–0.919) |
|                                                                                            | 1000 m | 0.932 (0.929–0.935) | 0.918 (0.914–0.921) | 0.921 (0.917–0.925) | 0.904 (0.900–0.909) |
|                                                                                            | 2000 m | 0.925 (0.922–0.928) | 0.907 (0.903–0.911) | 0.913 (0.909–0.917) | 0.893 (0.888–0.898) |
|                                                                                            | 3000 m | 0.919 (0.916–0.922) | 0.899 (0.895–0.904) | 0.906 (0.903–0.910) | 0.884 (0.879–0.889) |

Abbreviations: LBW, low birth weight; TLBW, term low birth weight; OR, odds ratio; CI, confidence interval; NDVI, normalized difference vegetation index; EVI, enhanced vegetation index; SES, socioeconomic status.

**Table S2 Associations between LBW/TLBW and quartiles of normalized difference vegetation index exposure within multiple buffers.**

| Buffer        | Quantiles | Median | LBW                 |                  | TLBW                |                  |
|---------------|-----------|--------|---------------------|------------------|---------------------|------------------|
|               |           |        | OR (95% CI)         | <i>P</i> -trend* | OR (95% CI)         | <i>P</i> -trend* |
| <b>500 m</b>  | Q1        | 0.103  | 1 (Ref.)            |                  | 1 (Ref.)            |                  |
|               | Q2        | 0.219  | 0.981 (0.979–0.982) | <0.001           | 0.975 (0.974–0.977) | <0.001           |
|               | Q3        | 0.325  | 0.973 (0.972–0.975) |                  | 0.967 (0.966–0.969) |                  |
|               | Q4        | 0.554  | 0.965 (0.963–0.966) |                  | 0.961 (0.960–0.963) |                  |
| <b>1000 m</b> | Q1        | 0.106  | 1 (Ref.)            |                  | 1 (Ref.)            |                  |
|               | Q2        | 0.221  | 0.984 (0.983–0.985) | <0.001           | 0.978 (0.977–0.980) | <0.001           |
|               | Q3        | 0.332  | 0.973 (0.971–0.974) |                  | 0.966 (0.964–0.967) |                  |
|               | Q4        | 0.541  | 0.962 (0.960–0.963) |                  | 0.958 (0.957–0.960) |                  |
| <b>2000 m</b> | Q1        | 0.109  | 1 (Ref.)            |                  |                     |                  |
|               | Q2        | 0.233  | 0.982 (0.980–0.983) | <0.001           | 0.976 (0.974–0.978) | <0.001           |
|               | Q3        | 0.336  | 0.970 (0.969–0.972) |                  | 0.963 (0.961–0.965) |                  |
|               | Q4        | 0.524  | 0.960 (0.959–0.962) |                  | 0.956 (0.955–0.958) |                  |

These estimates are derived from the fully-adjusted model, where covariates include maternal demographic characteristics, fetal variables, and environmental factors. Error bars represent 95% confidence intervals. The statistical tests are two-sided. Abbreviations: LBW, low birth weight; TLBW, term low birth weight; OR, odds ratio; CI, confidence interval.

\* Tested by introducing the median value of each quartile as a continuous variable in the logistic regression model.

**Table S3 Associations between LBW/TLBW and quartiles of enhanced vegetation index exposure within multiple buffers.**

| Buffer        | Quantile | Median | LBW                 |                  | TLBW                |                  |
|---------------|----------|--------|---------------------|------------------|---------------------|------------------|
|               |          |        | OR (95% CI)         | <i>P</i> -trend* | OR (95% CI)         | <i>P</i> -trend* |
| <b>500 m</b>  | Q1       | 0.070  | 1 (Ref.)            |                  | 1 (Ref.)            |                  |
|               | Q2       | 0.154  | 0.983 (0.981–0.984) | <0.001           | 0.976 (0.975–0.978) | <0.001           |
|               | Q3       | 0.230  | 0.978 (0.976–0.979) |                  | 0.971 (0.969–0.973) |                  |
|               | Q4       | 0.418  | 0.965 (0.964–0.967) |                  | 0.962 (0.960–0.964) |                  |
| <b>1000 m</b> | Q1       | 0.071  | 1 (Ref.)            |                  | 1 (Ref.)            |                  |
|               | Q2       | 0.160  | 0.986 (0.985–0.988) | <0.001           | 0.980 (0.978–0.981) | <0.001           |
|               | Q3       | 0.235  | 0.974 (0.972–0.975) |                  | 0.966 (0.965–0.968) |                  |
|               | Q4       | 0.410  | 0.964 (0.962–0.965) |                  | 0.961 (0.959–0.963) |                  |
| <b>2000 m</b> | Q1       | 0.072  | 1 (Ref.)            |                  | 1 (Ref.)            |                  |
|               | Q2       | 0.168  | 0.982 (0.981–0.984) | <0.001           | 0.976 (0.975–0.978) | <0.001           |
|               | Q3       | 0.239  | 0.970 (0.969–0.972) |                  | 0.963 (0.962–0.965) |                  |
|               | Q4       | 0.390  | 0.963 (0.962–0.964) |                  | 0.960 (0.958–0.961) |                  |

These estimates are derived from the fully-adjusted model, where covariates include maternal demographic characteristics, fetal variables, and environmental factors. Error bars represent 95% confidence intervals. The statistical tests are two-sided. Abbreviations: LBW, low birth weight; TLBW, term low birth weight; OR, odds ratio; CI, confidence interval.

\* Tested by introducing the median value of each quartile as a continuous variable in the logistic regression model.

**Table S4 Stratified analyses for the associations of LBW and TLBW with greenness exposure within a 3000-m buffer.**

| Subgroup               | NDVI                |                 | EVI                 |                 |
|------------------------|---------------------|-----------------|---------------------|-----------------|
|                        | OR (95% CI)         | <i>P-value*</i> | OR (95% CI)         | <i>P-value*</i> |
| <b>LBW</b>             |                     |                 |                     |                 |
| <b>Age</b>             |                     |                 |                     |                 |
| ≤25                    | 0.895 (0.890–0.900) | Ref.            | 0.862 (0.856–0.868) | Ref.            |
| (25, 35]               | 0.922 (0.918–0.926) | <0.001          | 0.901 (0.895–0.907) | <0.001          |
| >35                    | 0.923 (0.914–0.932) | <0.001          | 0.903 (0.891–0.914) | <0.001          |
| <b>Education level</b> |                     |                 |                     |                 |
| Below high school      | 0.897 (0.893–0.901) | Ref.            | 0.864 (0.859–0.870) | Ref.            |
| High school            | 0.936 (0.930–0.943) | <0.001          | 0.920 (0.911–0.928) | <0.001          |
| College or above       | 0.940 (0.933–0.948) | <0.001          | 0.925 (0.915–0.935) | <0.001          |
| <b>Residence</b>       |                     |                 |                     |                 |
| City                   | 0.919 (0.915–0.923) | Ref.            | 0.896 (0.892–0.901) | Ref.            |
| Village                | 0.893 (0.887–0.898) | <0.001          | 0.860 (0.853–0.867) | <0.001          |
| <b>TLBW</b>            |                     |                 |                     |                 |
| <b>Age</b>             |                     |                 |                     |                 |
| ≤25                    | 0.884 (0.878–0.889) | Ref.            | 0.848 (0.841–0.856) | Ref.            |
| (25, 35]               | 0.910 (0.905–0.916) | <0.001          | 0.887 (0.881–0.894) | <0.001          |
| >35                    | 0.913 (0.902–0.924) | <0.001          | 0.888 (0.874–0.902) | <0.001          |
| <b>Education level</b> |                     |                 |                     |                 |
| Below high school      | 0.883 (0.878–0.888) |                 | 0.846 (0.840–0.852) | Ref.            |
| High school            | 0.931 (0.924–0.939) | <0.001          | 0.914 (0.904–0.924) | <0.001          |
| College or above       | 0.935 (0.926–0.944) | <0.001          | 0.922 (0.911–0.934) | <0.001          |
| <b>Residence</b>       |                     |                 |                     |                 |
| City                   | 0.908 (0.904–0.912) | Ref.            | 0.884 (0.878–0.890) | Ref.            |
| Village                | 0.879 (0.873–0.886) | <0.001          | 0.842 (0.833–0.850) | <0.001          |

These estimates are derived from the fully-adjusted model, where covariates include maternal demographic characteristics, fetal variables, and environmental factors. Error bars represent 95% confidence intervals. \* refers to effect heterogeneity between subgroups, which is examined through a fixed effect meta-regression method. The statistical tests are two-sided. Abbreviations: OR, odds ratio; CI, confidence interval; NDVI, normalized difference vegetation index; EVI, enhanced vegetation index; LBW, low birth weight; TLBW, term low birth weight.

**Table S5 Estimates of greenness-related attributable fraction and avoidable number of LBW and TLBW by achieving targets of mean NDVI or EVI.**

| Exposure               | Attributable fraction (% , 95% CI) |               | Avoidable number (n, 95% CI) |                  |
|------------------------|------------------------------------|---------------|------------------------------|------------------|
|                        | LBW                                | TLBW          | LBW                          | TLBW             |
| <b>NDVI</b>            |                                    |               |                              |                  |
| NDVI <sub>.500m</sub>  | 4.7 (4.4–4.9)                      | 5.9 (5.6–6.2) | 4233 (4016–4451)             | 2292 (2180–2405) |
| NDVI <sub>.1000m</sub> | 5.1 (4.9–5.4)                      | 6.4 (6.1–6.7) | 4637 (4413–4863)             | 2473 (2358–2589) |
| NDVI <sub>.2000m</sub> | 5.5 (5.2–5.7)                      | 6.9 (6.6–7.2) | 4956 (4721–5192)             | 2682 (2562–2802) |
| NDVI <sub>.3000m</sub> | 5.6 (5.4–5.9)                      | 6.9 (6.6–7.3) | 5099 (4855–5343)             | 2697 (2573–2822) |
| <b>EVI</b>             |                                    |               |                              |                  |
| EVI <sub>.500m</sub>   | 4.4 (4.1–4.6)                      | 5.6 (5.3–5.9) | 3931 (3711–4152)             | 2173 (2060–2287) |
| EVI <sub>.1000m</sub>  | 4.8 (4.6–5.1)                      | 6.1 (5.8–6.4) | 4374 (4147–4601)             | 2361 (2244–2479) |
| EVI <sub>.2000m</sub>  | 5.2 (4.9–5.5)                      | 6.6 (6.3–7.0) | 4702 (4462–4942)             | 2584 (2461–2707) |
| EVI <sub>.3000m</sub>  | 5.3 (5.0–5.6)                      | 6.6 (6.3–7.0) | 4807 (4556–5059)             | 2584 (2455–2712) |

Abbreviations: LBW, low birth weight; TLBW, term low birth weight; CI, confidence interval; NDVI, normalized difference vegetation index; EVI, enhanced vegetation index.



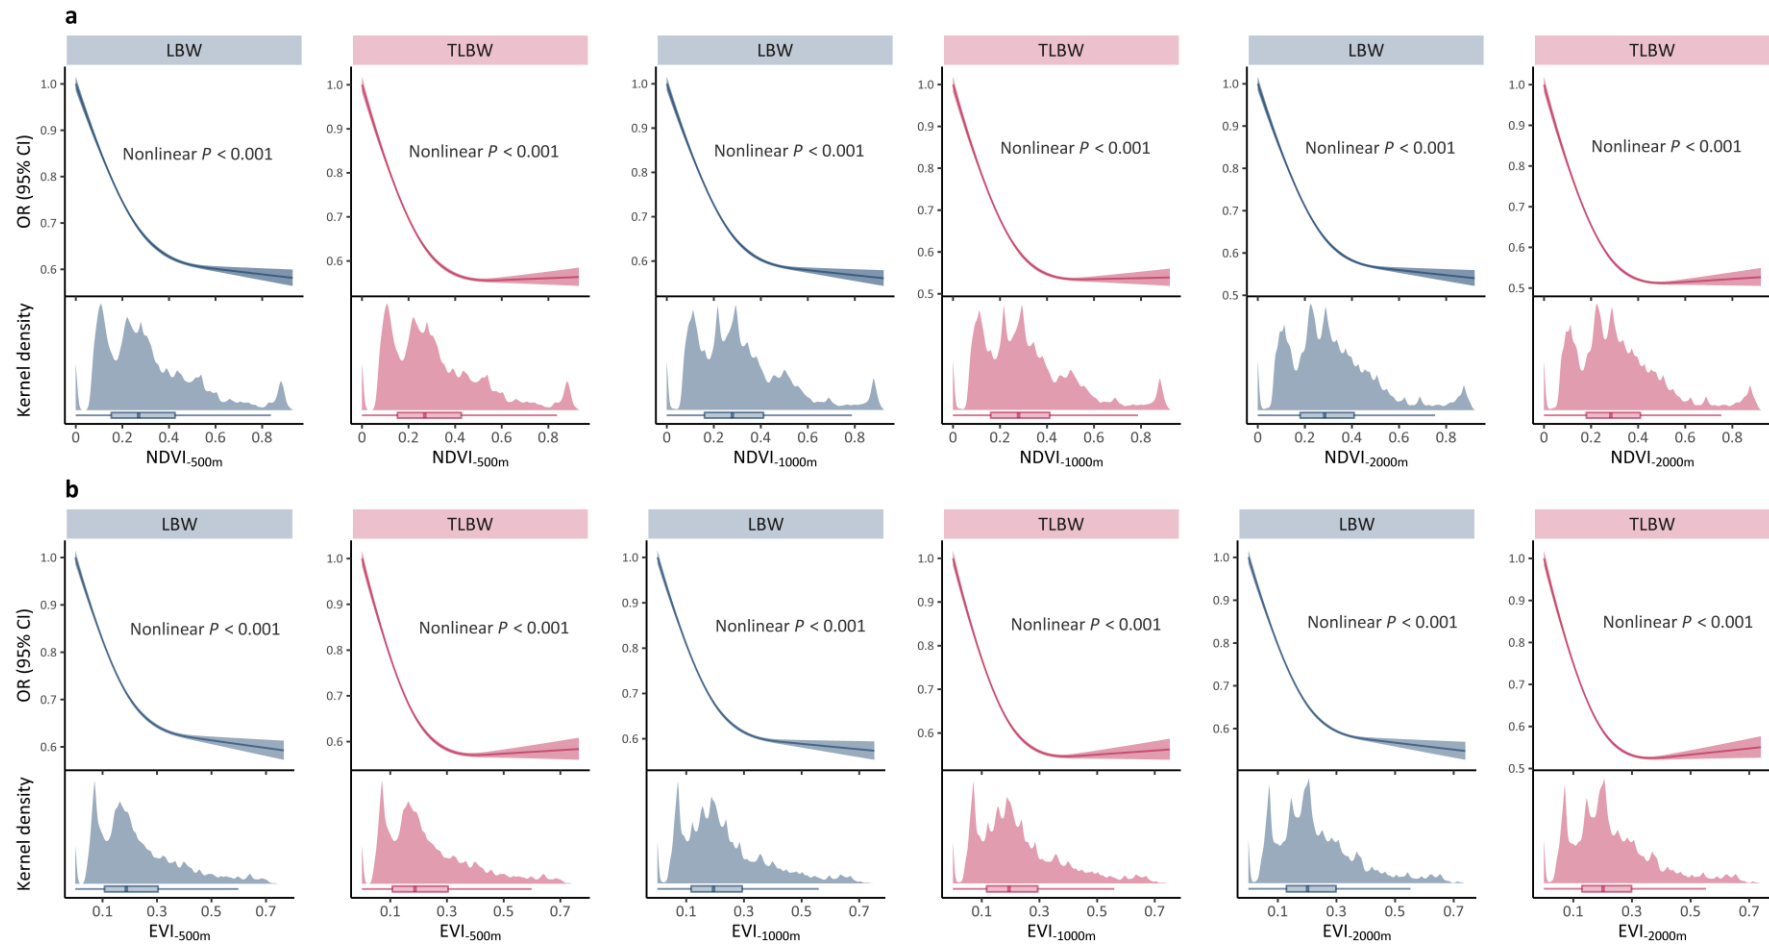

**Figure S1 Exposure-response associations between LBW/TLBW and NDVI (a) or EVI (b) within multiple buffers.** The curve was modeled using restricted cubic splines function with 3 knots placed at the 10<sup>th</sup>, 50<sup>th</sup>, and 90<sup>th</sup> percentiles of greenness exposure distribution. Abbreviations: OR, odds ratio; CI, confidence interval; LBW, low birth weight; TLBW, term low birth weight; NDVI, normalized difference vegetation index; EVI, enhanced vegetation index.

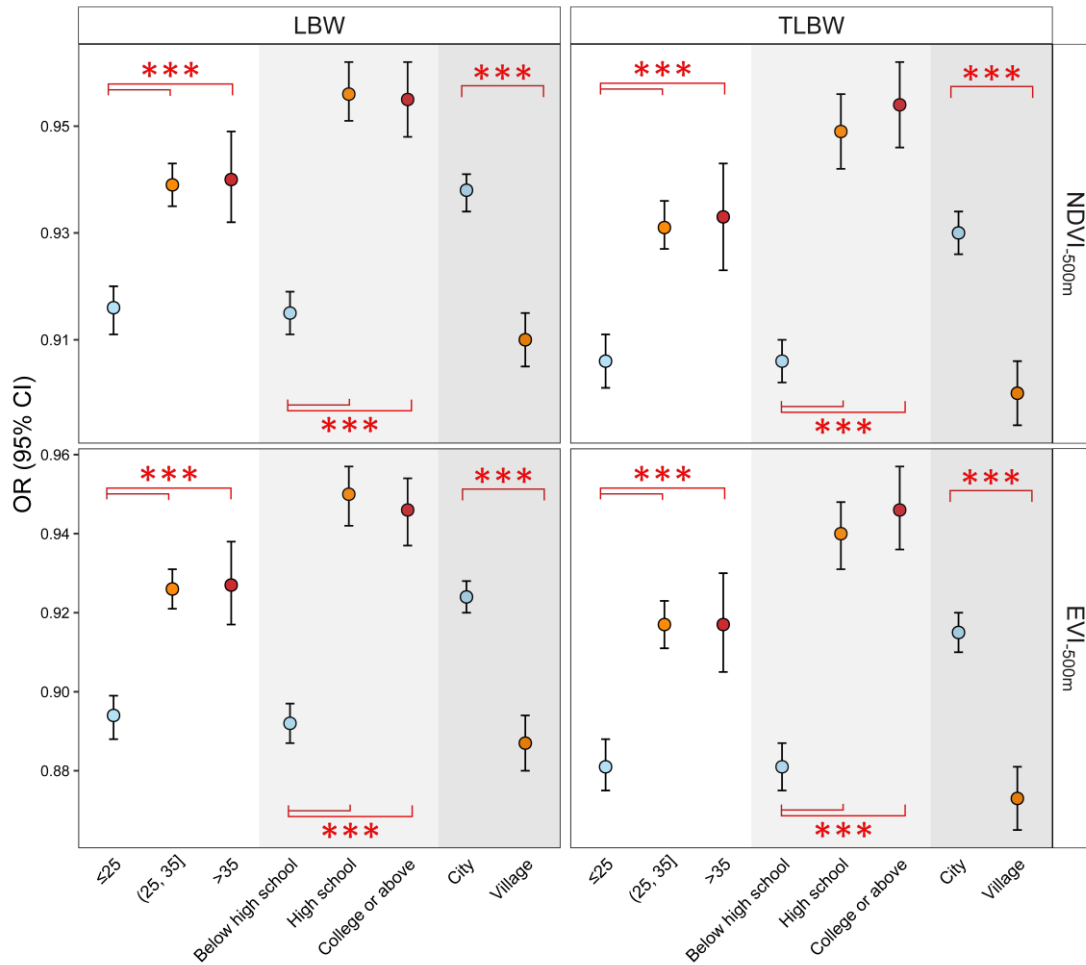

**Figure S2 Subgroup-specific OR estimates of LBW and TLBW associated with a 0.1-unit increase in NDVI and EVI within a 500-m buffer.** These estimates are derived from the fully-adjusted model, where covariates include maternal demographic characteristics, fetal variables, and environmental factors. Error bars represent 95% confidence intervals. Effect heterogeneity between subgroups is examined through a fixed effect meta-regression method, and the statistical tests are two-sided. The exact sample sizes for subgroups are exhibited in Table 1. \*\*\* indicates  $P < 0.001$  for effect heterogeneity between subgroups. Abbreviations: OR, odds ratio; LBW, low birth weight; TLBW, term low birth weight; NDVI, normalized difference vegetation index; EVI, enhanced vegetation index.

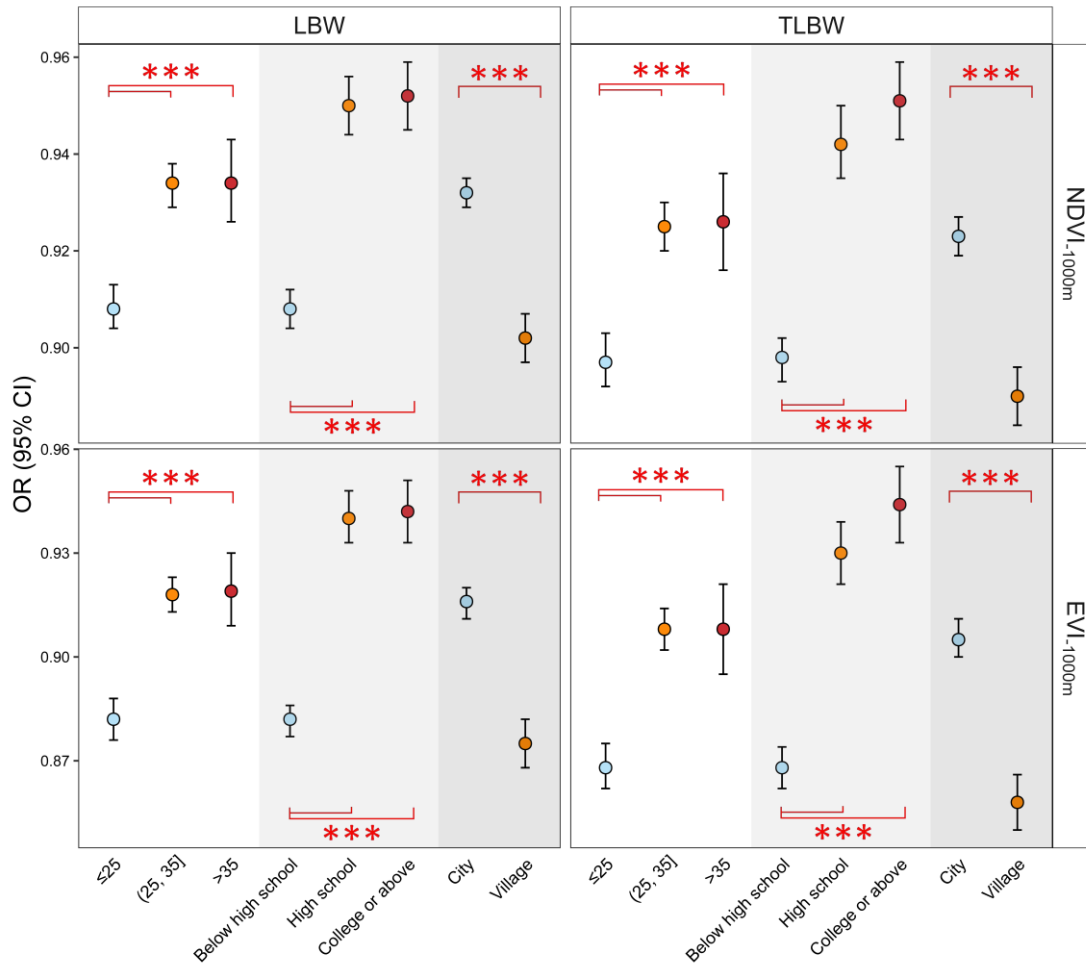

**Figure S3 Subgroup-specific OR estimates of LBW and TLBW associated with a 0.1-unit increase in NDVI and EVI within a 1000-m buffer.** These estimates are derived from the fully-adjusted model, where covariates include maternal demographic characteristics, fetal variables, and environmental factors. Error bars represent 95% confidence intervals. Effect heterogeneity between subgroups is examined through a fixed effect meta-regression method, and the statistical tests are two-sided. The exact sample sizes for subgroups are exhibited in Table 1. \*\*\* indicates  $P < 0.001$  for effect heterogeneity between subgroups. Abbreviations: OR, odds ratio; LBW, low birth weight; TLBW, term low birth weight; NDVI, normalized difference vegetation index; EVI, enhanced vegetation index.

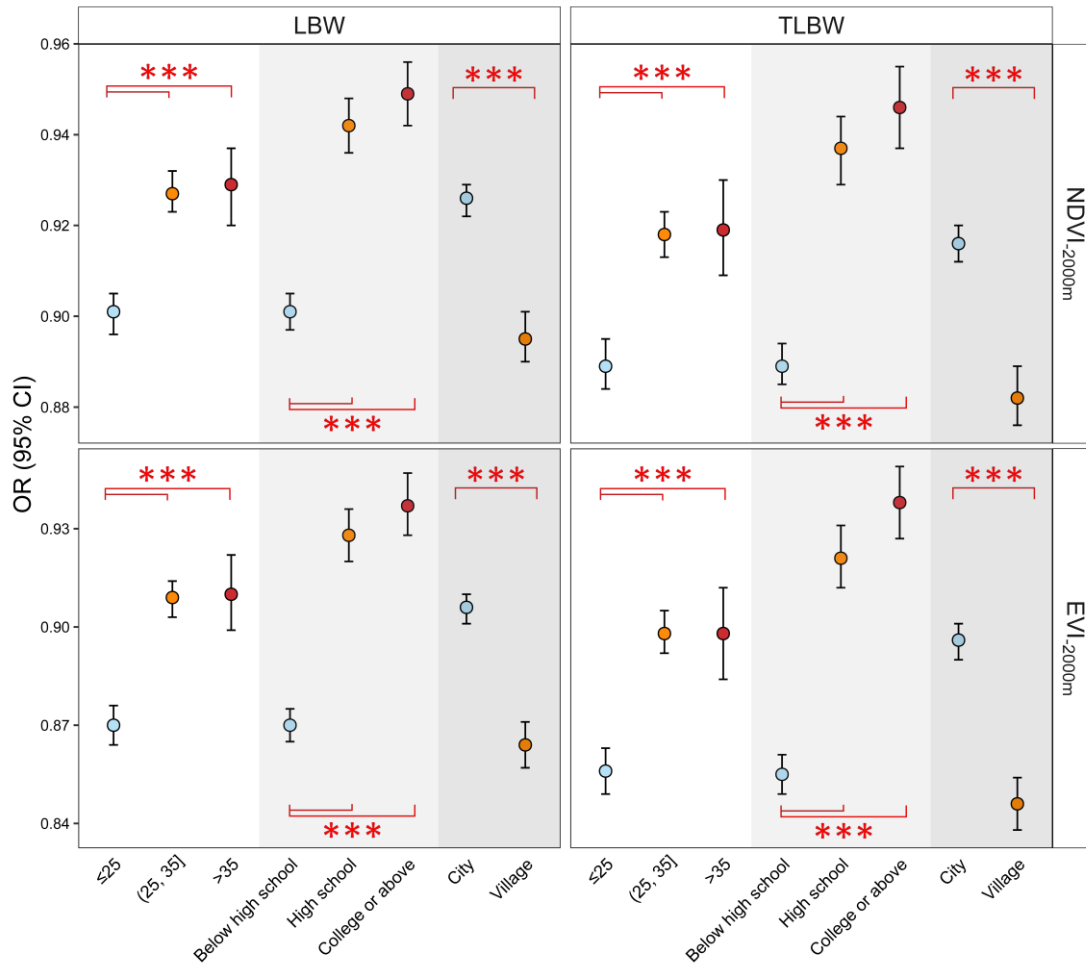

**Figure S4 Subgroup-specific OR estimates of LBW and TLBW associated with a 0.1-unit increase in NDVI and EVI within a 2000-m buffer.** These estimates are derived from the fully-adjusted model, where covariates include maternal demographic characteristics, fetal variables, and environmental factors. Error bars represent 95% confidence intervals. Effect heterogeneity between subgroups is examined through a fixed effect meta-regression method, and the statistical tests are two-sided. The exact sample sizes for subgroups are exhibited in Table 1. \*\*\* indicates  $P < 0.001$  for effect heterogeneity between subgroups. Abbreviations: OR, odds ratio; LBW, low birth weight; TLBW, term low birth weight; NDVI, normalized difference vegetation index; EVI, enhanced vegetation index.

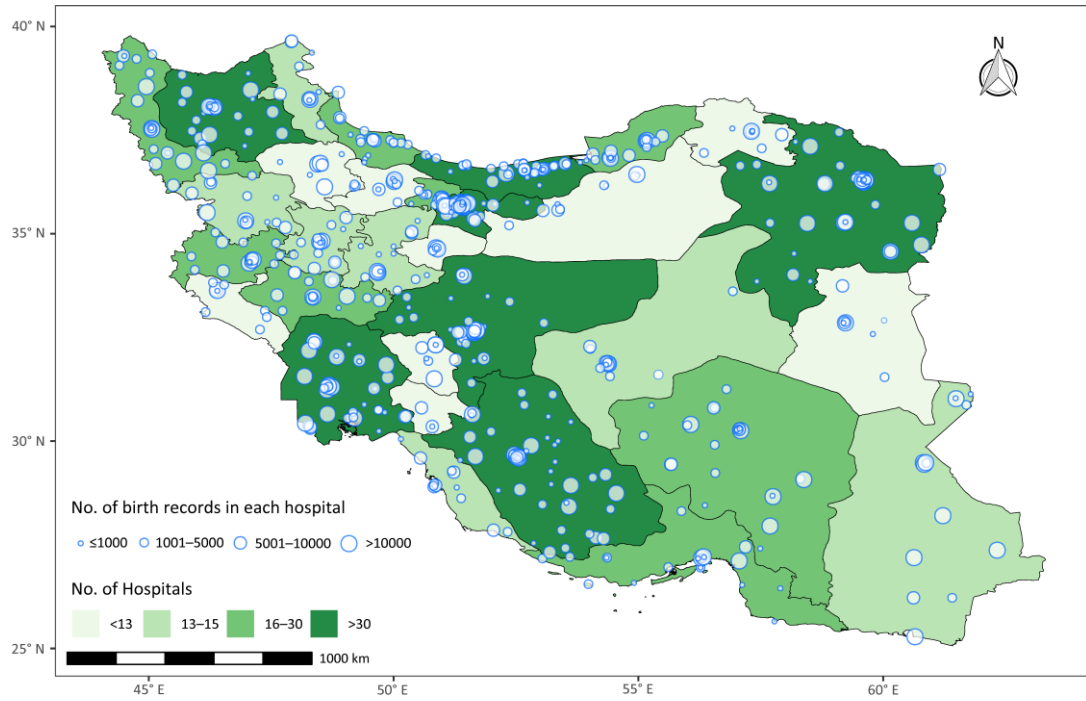

**Figure S5 Geographic locations of 749 hospitals across Iran included in this study.** Shapefile for Iran is publicly downloaded from [https://gadm.org/download\\_country.html](https://gadm.org/download_country.html).
