# Supplementary material for: Surrounding greenness is associated with lower risk and burden of low birth weight in Iran
Source: PubMed Central journal article supplement (PMC10663448; doi:10.1038/s41467-023-43425-6), 2023-11-21
Supplement: 41467_2023_43425_MOESM3_ESM.pdf [file 41467_2023_43425_MOESM3_ESM.pdf]

## **Description of Additional Supplementary Files**

**File name:** Supplementary Code

**Description:** R codes for statistical analyses and drawing figures.
